# Supplementary material for: Revascularization versus Medical Therapy for Renal-Artery Stenosis
Source: Atypon-hosted journal article supplement (doi:10.1056/nejmoa0905368), 2009-11-11
Supplement: nejm_astral_1953sa1.pdf [file nejm_astral_1953sa1.pdf]

## Supplementary Appendix

This appendix has been provided by the authors to give readers additional information about their work.

Supplement to: The ASTRAL Investigators. Revascularization versus medical therapy for renal-artery stenosis. N Engl J Med 2009;361:1953-62.

(PDF updated June 30, 2010.)

# Supplementary Appendix Figure 1: CONSORT Diagram for ASTRAL – Patient Recruitment and Follow-up

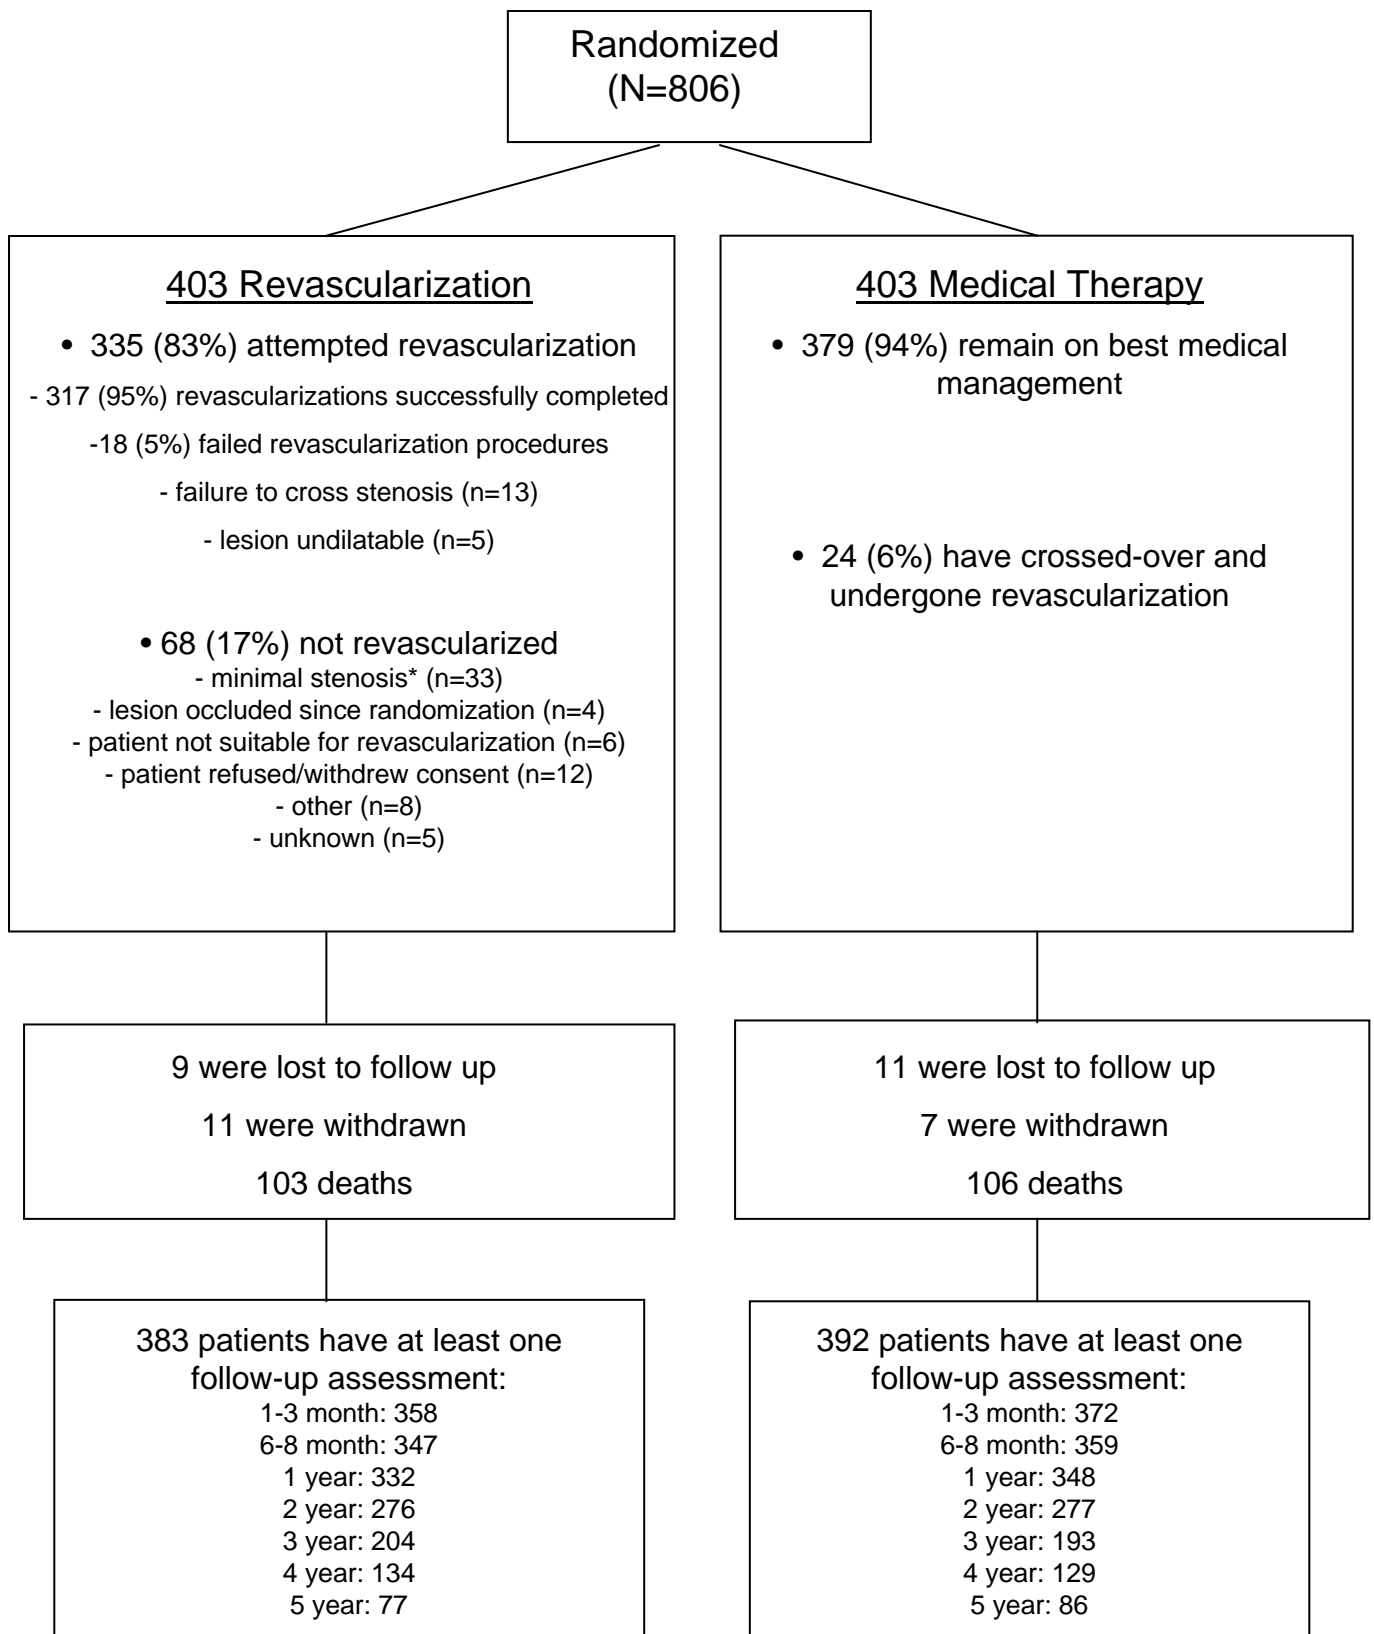

\* These patients were identified as having minimal stenosis post-randomization, as patients entered into ASTRAL based on computed tomographic (CTA) or magnetic resonance angiography (MRA) (which can over-estimate renal artery stenosis), who were randomized to revascularization, were required to have 'on the table' intraarterial angiography to check the accuracy of the CTA and MRA estimates of the renal artery stenosis.

## Supplementary Appendix Table 1: Medication at 1 Year Follow-up Assessment

|                                                          | Revascularization<br>(N=332) | Medical Therapy<br>(N=348) | P value |
|----------------------------------------------------------|------------------------------|----------------------------|---------|
| Antihypertensive drug – no./total no. (%)                |                              |                            |         |
| Any                                                      | 321/330 (97%)                | 343/345 (99%)              | 0.03    |
| Diuretic                                                 | 206/321 (64%)                | 238/343 (69%)              | 0.15    |
| Calcium-channel blocker                                  | 202/321 (63%)                | 242/343 (71%)              | 0.04    |
| Beta-blocker                                             | 148/321 (46%)                | 189/343 (55%)              | 0.02    |
| ACE inhibitor or ARB                                     | 161/321 (50%)                | 146/343 (43%)              | 0.05    |
| Alpha blocker                                            | 124/321 (39%)                | 130/343 (38%)              | 0.85    |
| No. of antihypertensive drugs in class – mean<br>(range) | 2.77 (1 - 6)                 | 2.97 (1 - 6)               | 0.03    |
| Antiplatelet drug – no./total no. (%)                    |                              |                            |         |
| Any                                                      | 270/327 (83%)                | 268/342 (78%)              | 0.17    |
| Aspirin                                                  | 239/270 (89%)                | 245/268 (91%)              | 0.26    |
| Cholesterol-lowering drug – no./total no. (%)            |                              |                            |         |
| Any                                                      | 281/328 (86%)                | 299/343 (87%)              | 0.57    |
| Statin                                                   | 273/281 (97%)                | 286/299 (96%)              | 0.33    |
| Warfarin – no./total no. (%)                             | 30/324 (9%)                  | 36/327 (11%)               | 0.46    |

\* ACE denotes angiotensin-converting enzyme, and ARB angiotensin-receptor blocker.

**Supplementary Appendix Table 2: Serum Creatinine and Blood Pressure over Time**

|                                                                                                   | Revascularization        | Medical Therapy          | Mean Difference<br>(95% Confidence Interval ) | P value |
|---------------------------------------------------------------------------------------------------|--------------------------|--------------------------|-----------------------------------------------|---------|
| <b>Mean slope over the 5-year study period</b>                                                    |                          |                          |                                               |         |
| Reciprocal serum creatinine<br>(liter/ $\mu$ mol/year)                                            | -0.07 x 10 <sup>-3</sup> | -0.13 x 10 <sup>-3</sup> | 0.06 x 10 <sup>-3</sup> (-0.002 to 0.13)      | 0.06    |
| Serum creatinine<br>( $\mu$ mol/liter/year)                                                       | 7.47                     | 10.52                    | -3.05 (-6.75 to 0.65)                         | 0.11    |
| <b>Mean reciprocal serum creatinine (standard deviation) – liter/<math>\mu</math>mol (x 1000)</b> |                          |                          |                                               |         |
| Baseline                                                                                          | N=403<br>6.47 (2.42)     | N=403<br>6.42 (2.29)     | 0.05 (-0.28 to 0.37)                          | 0.79    |
| 1-3 month                                                                                         | N=349<br>6.19 (2.45)     | N=363<br>6.26 (2.21)     | -0.07 (-0.41 to 0.27)                         | 0.69    |
| 6-8 month                                                                                         | N=336<br>6.40 (2.49)     | N=347<br>6.28 (2.30)     | 0.12 (-0.24 to 0.48)                          | 0.51    |
| 1 year                                                                                            | N=329<br>6.33 (2.54)     | N=343<br>6.28 (2.39)     | 0.05 (-0.32 to 0.43)                          | 0.78    |
| 2 year                                                                                            | N=263<br>6.53 (2.68)     | N=272<br>6.07 (2.35)     | 0.45 (0.03 to 0.88)                           | 0.04    |
| 3 year                                                                                            | N=191<br>6.46 (2.76)     | N=183<br>5.96 (2.50)     | 0.51 (-0.03 to 1.04)                          | 0.06    |
| 4 year                                                                                            | N=127<br>6.42 (2.86)     | N=119<br>6.14 (2.74)     | 0.28 (-0.42 to 0.99)                          | 0.43    |
| 5 year                                                                                            | N=72<br>5.96 (2.93)      | N=61<br>6.69 (2.61)      | -0.74 (-1.70 to 0.22)                         | 0.13    |
| <b>Mean serum creatinine (standard deviation) – <math>\mu</math>mol/liter</b>                     |                          |                          |                                               |         |
| Baseline                                                                                          | N=403<br>179.21 (75.79)  | N=403<br>178.24 (74.51)  | 0.97 (-9.42 to 11.37)                         | 0.85    |
| 1-3 month                                                                                         | N=349<br>191.72 (91.03)  | N=363<br>183.33 (80.22)  | 8.39 (-4.22 to 21.00)                         | 0.19    |
| 6-8 month                                                                                         | N=336<br>190.15 (111.48) | N=347<br>187.20 (96.46)  | 2.95 (-12.70 to 18.60)                        | 0.71    |

|                                                                   |                          |                          |                         |      |
|-------------------------------------------------------------------|--------------------------|--------------------------|-------------------------|------|
| 1 year                                                            | N=329<br>196.46 (123.69) | N=343<br>191.96 (111.71) | 4.50 (-13.34 to 22.34)  | 0.62 |
| 2 year                                                            | N=263<br>188.48 (115.08) | N=272<br>199.47 (116.01) | -10.99 (-30.62 to 8.64) | 0.27 |
| 3 year                                                            | N=191<br>195.96 (126.42) | N=183<br>214.81 (142.97) | -18.85 (-46.26 to 8.56) | 0.18 |
| 4 year                                                            | N=127<br>198.76 (127.92) | N=119<br>203.16 (115.78) | -4.40 (-35.10 to 26.31) | 0.78 |
| 5 year                                                            | N=72<br>209.47 (103.40)  | N=61<br>184.41 (120.49)  | 25.06 (-13.34 to 63.46) | 0.20 |
| <b>Mean systolic blood pressure (standard deviation) – mm Hg</b>  |                          |                          |                         |      |
| Baseline                                                          | N=385<br>148.79 (24.28)  | N=388<br>152.05 (25.23)  | -3.27 (-6.76 to 0.23)   | 0.07 |
| 1-3 month                                                         | N=346<br>147.77 (25.29)  | N=361<br>151.60 (26.08)  | -3.83 (-7.63 to -0.03)  | 0.05 |
| 6-8 month                                                         | N=332<br>146.58 (25.15)  | N=350<br>149.09 (25.16)  | -2.52 (-6.30 to 1.27)   | 0.19 |
| 1 year                                                            | N=321<br>145.66 (23.21)  | N=336<br>148.20 (24.22)  | -2.54 (-6.18 to 1.10)   | 0.17 |
| 2 year                                                            | N=257<br>142.05 (24.80)  | N=264<br>145.80 (23.83)  | -3.75 (-7.93 to 0.44)   | 0.08 |
| 3 year                                                            | N=197<br>143.02 (24.03)  | N=178<br>144.01 (21.90)  | -0.99 (-5.68 to 3.70)   | 0.68 |
| 4 year                                                            | N=125<br>144.18 (25.98)  | N=124<br>143.56 (25.62)  | 0.61 (-5.83 to 7.05)    | 0.85 |
| 5 year                                                            | N=71<br>141.17 (25.66)   | N=62<br>141.27 (25.49)   | -0.11 (-8.90 to 8.69)   | 0.98 |
| <b>Mean diastolic blood pressure (standard deviation) – mm Hg</b> |                          |                          |                         |      |
| Baseline                                                          | N=384<br>76.32 (12.24)   | N=388<br>75.89 (12.58)   | 0.43 (-1.33 to 2.18)    | 0.63 |
| 1-3 month                                                         | N=344<br>74.70 (12.05)   | N=361<br>75.07 (12.84)   | -0.37 (-2.21 to 1.48)   | 0.70 |

|           |                        |                        |                       |      |
|-----------|------------------------|------------------------|-----------------------|------|
| 6-8 month | N=330<br>74.12 (12.41) | N=349<br>73.92 (11.75) | 0.20 (-1.62 to 2.02)  | 0.83 |
| 1 year    | N=320<br>73.39 (11.92) | N=335<br>74.67 (12.41) | -1.28 (-3.15 to 0.59) | 0.18 |
| 2 year    | N=256<br>72.25 (12.00) | N=262<br>72.54 (11.86) | -0.30 (-2.36 to 1.76) | 0.78 |
| 3 year    | N=197<br>72.85 (11.08) | N=178<br>72.31 (11.76) | 0.53 (-1.79 to 2.85)  | 0.65 |
| 4 year    | N=125<br>75.05 (11.79) | N=123<br>71.57 (11.93) | 3.48 (0.51 to 6.45)   | 0.02 |
| 5 year    | N=70<br>72.96 (12.02)  | N=63<br>70.37 (13.27)  | 2.59 (-1.75 to 6.93)  | 0.24 |

For reciprocal serum creatinine, a positive difference is in favor of revascularization.

For serum creatinine and blood pressure, a negative difference is in favor of revascularization.

## Supplementary Appendix Figure 2: Mean Change in Serum Creatinine ( $\mu\text{mol/liter}$ ) between Randomization and 1 Year

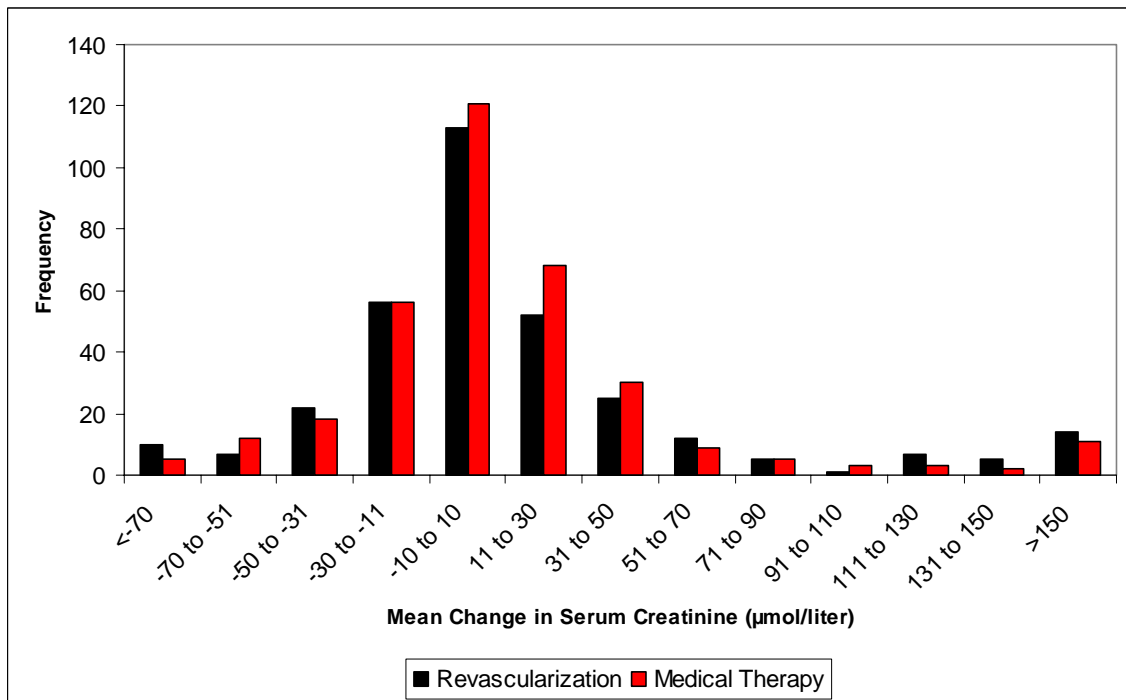

Negative change indicates an improvement in renal function over time.  
Positive change indicates a worsening renal function over time.

### Supplementary Appendix Figure 3: Per-Protocol Analysis of Serum Creatinine ( $\mu\text{mol/liter}$ )

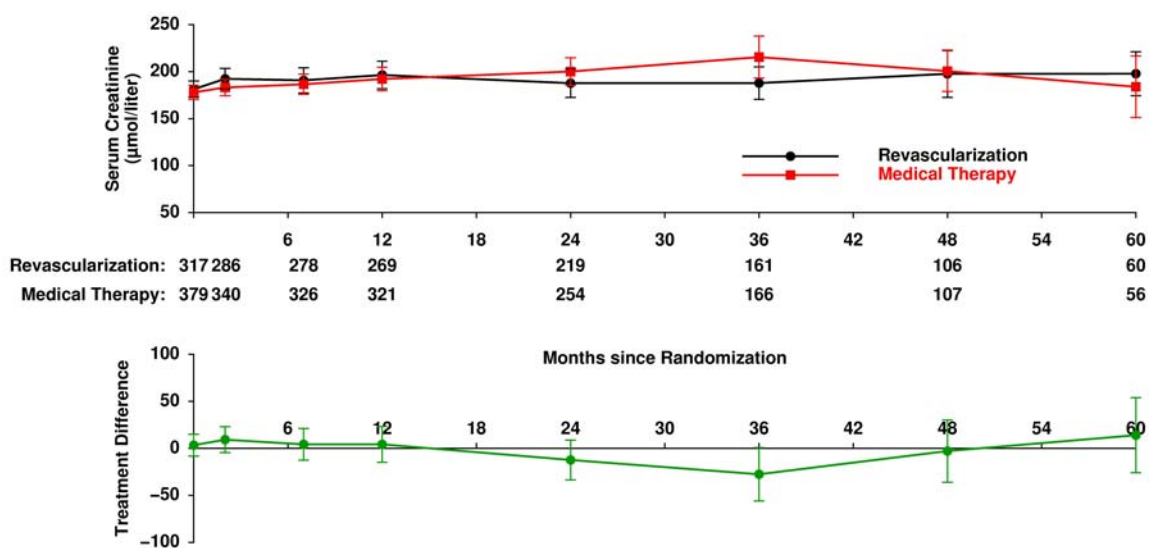

Footnote:

Per-protocol analysis based on the 317 patients' allocated revascularization which was successfully completed versus the 379 patients who remained on medical management.

A negative treatment difference is in favor of revascularization.

**Supplementary Appendix Figure 4a: Serum Creatinine ( $\mu\text{mol/liter}$ ) in the 163 Patients with**

**Very Severe Anatomical Disease**

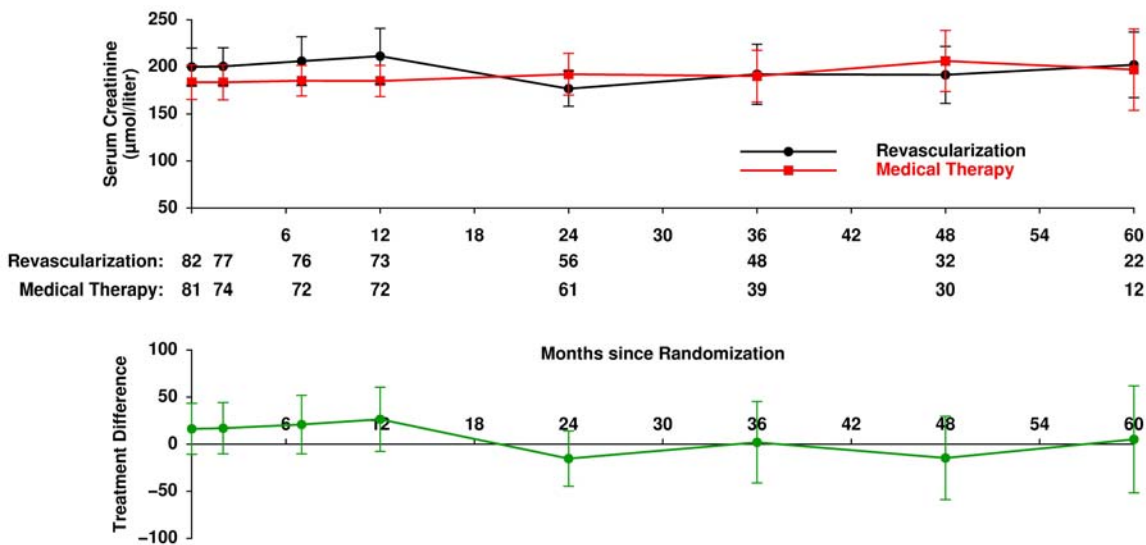

**Supplementary Appendix Figure 4b: Serum Creatinine ( $\mu\text{mol/liter}$ ) in Patients with less**

**Severe Anatomical Disease**

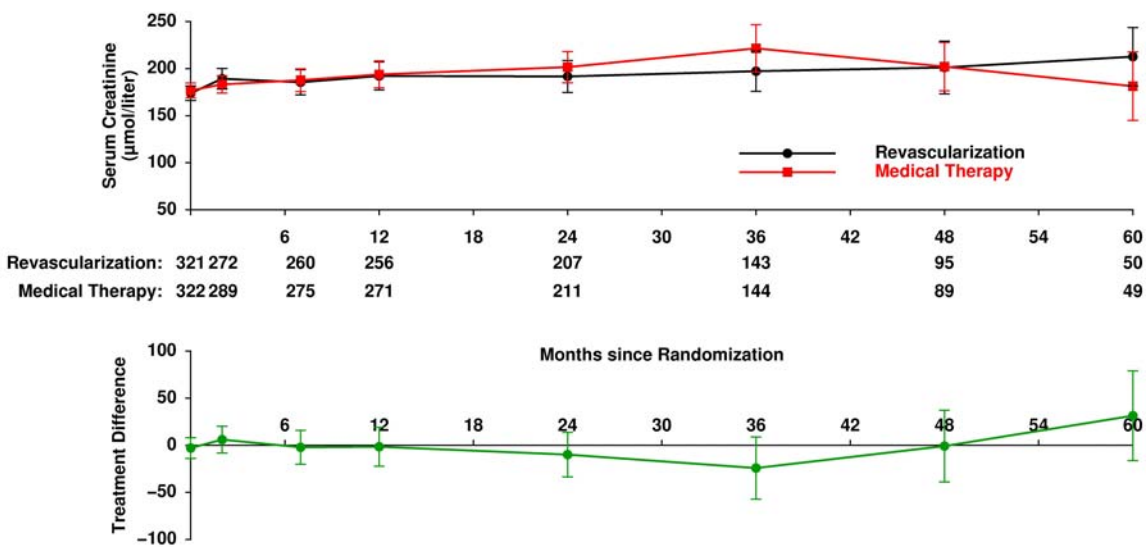

Footnote:

Severe anatomical disease defined as those patients with bilateral renal-artery stenosis  $>70\%$  ( $n=103$ ) or renal-artery stenosis  $>70\%$  in a solitary functioning kidney ( $n=60$ ).

A negative treatment difference is in favor of revascularization.

**Supplementary Appendix Table 3: Overall Incidence of Renal and Cardiovascular Events and Mortality**

|                                                      | <b>Revascularization</b> | <b>Medical Therapy</b> | <b>P value</b> |
|------------------------------------------------------|--------------------------|------------------------|----------------|
| <b>Renal Events</b>                                  | <b>(N=383)</b>           | <b>(N=392)</b>         |                |
| Acute kidney injury                                  | 25 (7%)                  | 23 (6%)                | 0.70           |
| Dialysis                                             | 36 (9%)                  | 40 (10%)               | 0.71           |
| <i>For end-stage renal disease</i>                   | 30                       | 31                     |                |
| <i>For acute kidney injury</i>                       | 6                        | 9                      |                |
| Transplantation                                      | 0 (-)                    | 0 (-)                  | -              |
| Nephrectomy                                          | 2 (0.5%)                 | 1* (0.3%)              | 0.62           |
| Renal arterial occlusion                             | 5 <sup>Ω</sup> (1%)      | 4 <sup>Ω</sup> (1%)    | 0.75           |
| Death due to renal failure                           | 10 (3%)                  | 17 (4%)                | 0.19           |
| Number of renal events / Number of patients†         | 73 / 57 (15%)            | 80 / 58 (15%)          | 0.97           |
|                                                      |                          |                        |                |
| <b>Cardiovascular Events</b>                         | <b>(N=386)</b>           | <b>(N=395)</b>         |                |
| Myocardial infarction                                | 36 (9%)                  | 37 (9%)                | 0.98           |
| Hospitalization for angina                           | 29 (8%)                  | 34 (9%)                | 0.57           |
| Hospitalization for fluid overload/cardiac failure   | 47 (12%)                 | 60 (15%)               | 0.22           |
| Coronary artery procedure (e.g. CABG or PCTA)        | 15 (4%)                  | 16 (4%)                | 0.91           |
| Other arterial procedure (e.g. amputation)           | 45 (12%)                 | 29 (7%)                | 0.04           |
| Stroke                                               | 24 (6%)                  | 23 (6%)                | 0.82           |
| Cardiovascular death                                 | 42 (11%)                 | 45 (11%)               | 0.82           |
| Number of cardiovascular events / Number of patients | 238 / 141 (37%)          | 244 / 145 (37%)        | 0.96           |
|                                                      |                          |                        |                |
| <b>Deaths<sup>£</sup></b>                            | <b>(N=403)</b>           | <b>(N=403)</b>         |                |
| Cardiovascular                                       | 42 (10%)                 | 45 (11%)               | 0.73           |
| Renal                                                | 10 (2%)                  | 17 (4%)                | 0.17           |

|                        |           |           |      |
|------------------------|-----------|-----------|------|
| Infection              | 17 (4%)   | 14 (3%)   | 0.58 |
| Cancer                 | 15 (4%)   | 13 (3%)   | 0.70 |
| Other/Unknown          | 30 (7%)   | 31 (8%)   | 0.89 |
| Total Number of Deaths | 103 (26%) | 106 (26%) | 0.81 |

\* One medical therapy patient had a partial nephrectomy due to renal carcinoma.

Ω All renal arterial occlusions in the revascularization arm and one renal arterial occlusion in the medical therapy arm occurred intra-procedurally.

† Not including renal arterial occlusions or partial nephrectomy due to renal carcinoma.

£ Specific causes of death listed are not exclusive, as some patients had multiple causes of death.

**Supplementary Appendix Table 4: Complications of Revascularization Procedure**

|                                                                                               | <b>Revascularization</b> | <b>Medical Therapy</b> |
|-----------------------------------------------------------------------------------------------|--------------------------|------------------------|
| <b>Peri-procedural complications (within 24 hours)</b>                                        | <b>(N=335)</b>           | <b>(N=24)</b>          |
| Renal or stent embolization                                                                   | 5 (1.5%)                 | 0 (-)                  |
| Renal arterial thrombosis or occlusion                                                        | 4 (1%) <sup>†</sup>      | 0 (-)                  |
| Renal arterial perforation or dissection                                                      | 3 (1%)                   | 1 (4%)                 |
| Non-renal embolization                                                                        | 3 (1%) <sup>Ω</sup>      | 0 (-)                  |
| Stent misplacement requiring additional stent                                                 | 10 (3%)                  | 0 (-)                  |
| Distal stent retrieval or deployment                                                          | 1 (0.3%)                 | 0 (-)                  |
| Balloon rupture                                                                               | 1 (0.3%)                 | 0 (-)                  |
| Need for surgical rescue                                                                      | 0 (-)                    | 0 (-)                  |
| Access vessel damage                                                                          | 7 (2%)                   | 0 (-)                  |
| Pulmonary edema <sup>σ</sup>                                                                  | 1 (0.3%)                 | 0 (-)                  |
| Femoral artery aneurysm at puncture site <sup>σ</sup>                                         | 1 (0.3%)                 | 0 (-)                  |
| Myocardial infarction <sup>σ</sup>                                                            | 1 (0.3%)                 | 0 (-)                  |
| Number of events / Number of patients                                                         | 37 / 30                  | 1 / 1                  |
| <b>Post-operative complications (between 24 hours and 1 month post procedure)<sup>x</sup></b> | <b>(N=280)</b>           |                        |
| Groin hemorrhage/hematoma                                                                     | 32 (11%) <sup>^</sup>    | -                      |
| Deterioration in renal function                                                               | 30 (11%) <sup>ε</sup>    | -                      |
| Pseudoaneurysm                                                                                | 3 (1%)                   | -                      |
| Renal artery occlusion                                                                        | 1 (0.4%)                 | -                      |
| Local infection at puncture site                                                              | 1 (0.4%)                 | -                      |
| Death within 30 days                                                                          | 2 (0.7%)                 |                        |
| Number of events / Number patients                                                            | 69 / 55                  | -                      |

† Two renal arterial thrombosis/occlusion events were also reported as serious adverse events.

Ω All three non-renal embolization events were also reported as serious adverse events, with patients having cholesterol embolism leading to peripheral gangrene and amputation of toes or limbs.

σ Events reported as serious adverse events.

χ Data only collected in patients randomized to revascularization, and data were only available in 280 of the 335 patients where revascularization was attempted.

λ Four groin hemorrhages resulted in hospitalization that were also reported as serious adverse events.

ε Two cases of deterioration in renal function were also reported as serious adverse events (arterial occlusions).

## **SUPPLEMENTARY APPENDIX - ASTRAL Investigators**

In addition to the Writing Committee, the following investigators participated in the ASTRAL trial:

### **Data Monitoring Committee:**

N. Buller, M. Flather (Chair), P. Royston, P. Whelton.

### **Serious Adverse Event Safety Committee:**

N. Ives, PA. Kalra, JG. Moss.

### **Trial Management Committee:**

C. Baigent, S. Carr, N. Chalmers, D. Eadington, K. Fitzpatrick-Ellis, R. Gray, G. Hamilton,

N. Ives, PA. Kalra (nephrology lead), G. Lipkin, JG. Moss (radiology lead), A. Nicholson, J.

Scoble, K. Wheatley.

### **Trial Steering Committee:**

D. Clayton, D. Crane, A. Dixon, PA. Kalra (nephrology lead), N. Mallick (Chair), JG. Moss

(radiology lead), M. Roberts (MRC observer), J. Voight (MRC observer), K. Wheatley.

### **University of Birmingham Clinical Trials Unit (trial co-ordination, IT and analysis):**

E. Adey, J. Daniels, K. Fitzpatrick-Ellis, R. Gair, S. Goodsell, K. Handley, J. Harding, N.

Hilken, N. Ives, S. Jeyaseelan, M. Nixon, L. Patel, S. Patel, L. Scott, M. Wilks.

**The following centers and investigators (listed in alphabetical order) participated in**

**the trial:** (figures in parentheses indicate number of patients entered) (the Principal

Investigator at each center is indicated by \*):

*Aberdeen Royal Infirmary* (32) - W. Crichton, J. Furnace, P. Thorpe, J. Webster\*, K. Witte; *Antrim Area Hospital, Northern Ireland* (2) – C. Harron\*; *Arrowe Park Hospital, Wirral* (7) – R. Klenka, M. Lipton, J. Magennis, P. McClelland\*; *Ayr & Crosshouse Hospitals* (2) – A. Innes, P. MacKenzie, I. McKaye\*; *Belfast City Hospital, Northern Ireland* (3) – H. Brown\*, C. Doherty, D. Fogarty, R. Hannon, G. Johnston, L. Johnston, W. Loan, P. Maxwell; *Birmingham Heartlands Hospital* (14) – M. Carmoody, PM. Crowe, J. Henderson, SA. Smith, M. Temple, M. Thomas\*; *Charing Cross Hospital, London* (2) – E. Brown\*, A. Frankel, RM. Greenhalgh, J. Mclvor, A. Mitchell, M. Roddie; *Christchurch Hospital, New Zealand* (4) – A. Laing, D. McGregor, M. Searle\*, J. Usher; *Conquest Hospital, St Leonards-on-Sea* (1) – JA. Giles\*; *Countess of Chester Hospital* (3) – G. Abbott, J. Clements, A. Crowe\*, P. Fitzgerald, M. Johnson, G. King, W. McMahon, GR. Sissons; *Derby City General Hospital* (10) – M. De Nunzio, R. Fluck\*, CW. McIntyre; *Derriford Hospital, Plymouth* (38) – H. Cramp, W. Douie, RJ. McGonigle, CA. Roobottom\*, P. Rowe, W. Tse, I. Wells, C. West; *Dorset County Hospital* (providing patient follow-up) – J. Taylor\*; *Dumfries and Galloway Hospital* (7) – A. Brammah, J. Dreyer, D. Hill, C. Isles\*, K. Isles, S. Robertson, G. Watson; *Edinburgh Royal Infirmary* (5) – P. Gibson, I. Gillespie\*, J. Goddard, S. Ingram, C. Whitworth, R. Winney; *Freeman Hospital, Newcastle-upon-Tyne* (4) – M. Ablet, A. Brown\*, T. Chaudry, R. Christer, P. Haslam, R. Jackson, S. Kanagasundaran, HWC. Loose, S. MacDonald, L. Mitchell, L. Murthy, R. Owen, J. Rose, JS. Tapson, MK. Ward; *Frimley Park & St Helier Hospitals* (16) – P. Andrews, M. Bending, K. Bundy, A. Eisinger, JRW. Hall,

F. Harris, A. Hatrick\*, A. Keane, A. Keightley, J. Kwan, JE. Marsh, H. Massouh, T. North, N. Velasco; *Gartnavel Hospital & Western Infirmary, Glasgow* (46) – D. Briggs, JM. Connell, C. Daly, AF. Dominiczak, R. Edwards, C. Geddes, A. Gordon, M. Gorrie, J. Innes, A. Jardine, BJ. Junor, M. MacDonald, E. McGregor, M. McIntyre, F. McLean, M. McMillan, PA. Meredith, JJ. Morton, JG. Moss\*, N. Padmanabhan, I. Robertson, S. Rodger, P. Semple; *Glan Clwyd Hospital* (16) – S. Baikunje, R. Byrne, R. Glover, MJ. Kumwenda\*, C. McConnell, E. Moss; *Glasgow Royal Infirmary* (23) – C. Deighan\*, C. Ferguson, J. Fox, R. MacTier, G. Roditi, K. Simpson; *Gloucester Royal Hospital* (3) – R. Banks\*, P. Birch, A. Williams; *Gosford Hospital, Australia* (21) – E. Bohringer, L. Brady, S. Roger\*; *Guy's Hospital, London* (28) – M. Anodu, D. Goldsmith, S. Heffernan, J. Reidy, S. Sacks, J. Scoble\*, S. Thomas, J. Watkins; *Gwynedd District Hospital* (3) – T. Bedson, P. Birch\*, L. Bloodworth, H. Godfrey, M. Jibani, J. Owen, MK. Phanish; *Hairmyres Hospital, East Kilbride* (10) – M. Hand, S. Millar\*, G. Moreland, J. Young; *Hull Royal Infirmary* (26) – K. Bel'Eed, J. Cleland, J. Dyet, D. Eadington\*, D. Ettles, MJ. Farr, P. Huan Loh, D. Lewis, PT. McCollum, G. Robinson, P. Scott, L. Sellars; *Ipswich Hospital* (2) – G. Glancey, G. Picken\*, P. Whitear, P. Williams; *Launceston General Hospital, Tasmania* (34) – L. Anderson, D. Cooke, R. Fassett, J-S. Gan, B. Herman, MC. Mathew\*, M. Smith; *Leicester General Hospital* (30) – J. Barratt, K. Blanshard, A. Bolia, N. Brunskill, S. Carr\*, S. Dickinson, H. El-Shazly, J. Feehally, B. Fentum, G. Fishwick, K. Harris, J. James, K. Krarup, T. Kumar, AJP. Lewington, J. Medcalfe, S. Nicholson, Y. Rees, H. Thurston, P. Topham, M. Turner, G. Warwick, B. Williams; *Lister Hospital, Stevenage* (1) – K. Farrington\*, A. Fry, C. King, C. Prendergast, P. Warwicker; *Manchester Royal Infirmary* (28) – H. Andrew, F. Ballardie, J. Bendle, N. Chalmers\*, D. Comer, JK. Cruikshank, K. Czapla, P. Durrington, R. Gokal, A. Heagerty, P. Hodson, L. Howard, A. Hutchison, R. Malik, N. Mallick, M. Picton, F.

Qasim, CD. Short, JV. Smyth, D. Tunbridge, J. Wright; *Morrison Hospital, Swansea* (2) – SE. Evans, T. Davies, D. Roberts, A. Williams\*; *Ninewells Hospital, Dundee* (35) – S. Chakraverty, N. Gourlay, I. Henderson, JG. Houston\*, T. McDonald, AD. Struthers, I. Zealley; *Northern General Hospital, Sheffield* (2) – CB. Brown, P. Brown, S. Brown, T. Cleveland, C. Davies, A. El Nahas, H. Euinton, I. Ihmoda, YC. Kuan\*, P. Moorhead, A. Procter, S. Thomas, D. Throssell; *Nottingham City Hospital* (4) – M. Cassidy, A. Manhire, SD. Roe\*; *Pennine Acute Hospital, Rochdale* (1) – I. Erekosima, R. Raja, DJ. Smithard\*; *Queen Alexandra Hospital, Portsmouth* (15) – M. Arkanath, J. Atchley, S. Baikunte, L. Coni, I. Fairley, AF. Hughes, J. Langham Brown, TD. Leach, RJ. Lewis, JC. Mason, JM. Stevens, G. Venkat-Ramen\*; *Queen Elizabeth Hospital, Birmingham* (51) – D. Adu, S. Ball, G. Beevers, R. Borrowes, N. Buller, P. Cockwell, L. Crutch, C. Day, C. Ferro, L. Foggensteiner, V. Gray, H. Green, L. Harper, P. Hewins, K. Horton, H. Ibrahim, H. Joy, C. Kennedy, G. Lipkin\*, M. Little, U. Martin, I. McCafferty, F. McGlynn, K. Moniem, S. Olliff, N. Richards, P. Riley, C. Savage, D. Wheeler; *Queen Margaret Hospital, Dunfermline* (6) – KS. Buck, T. Daniel, H. Ireland, D. Jenkins, DM. Lewis, K. McBride\*, SM. Wood; *Royal Berkshire Hospital, Reading* (10) – LC. Barker, M. Gibson, J. King, RB. Naik\*; *Royal Cornwall Hospital* (6) – J. Barnes, C. Ferris, J. Hancock, P. Johnston\*, R. Parry, B. Smith, S. Travis; *Royal Devon and Exeter Hospital* (12) – R. D'Souza\*, D. Harrison, D. Kinsella, T. Watkinson; *Royal Free Hospital, London* (61) – D. Baker, JM. Cross\*, A. Davenport, A. Goode, G. Hamilton, R. Kinyanjui, F. Myint, AD. Platts, S. Powis, S. Smith, P. Sweny, J. Tibballs; *Royal Liverpool University Hospital* (3) – J. Alexander, A. Bakran, JM. Bone, PS. Carter, E. Garforth, R. McWilliams, M. Mohteshamzadeh\*, P. Pai, PC. Rowlands, R. Rustom, P. William; *Royal Perth Hospital, Australia* (8) – L. Burnette, A. Irish\*; *Royal Preston Hospital* (31) – J. Anderton, E. Bailey, RA. Coward, S. D'Souza, SP.

Gibson, P. MacDowall, D. Seriki, L. Solomon\*; *Royal United Hospital, Bath* (6) – R. Bradley, A. Chalmers, J. Fretwell, C. Hall\*, J. Hardman, S. Hayward, M. Horrocks, C. John; *Salford Royal Hospital, Salford* (74) – C. Cheung, T. Chrysochou, A. Cowie, A. El'Deen Shurrab, S. Gowland, D. Green, L. Haydock, J. Hegarty, PA. Kalra\*, H. Mamtora; *Southmead Hospital, Bristol* (5) – AJ. Armitage, C. Burton, C. Dudley\*, L. Dudley, T. Feest, S. Harper, J. Haworth, P. Lear, E. Loveday, P. Mathieson, D. Mitchell, J. Parkin, SC. Satchell, RM. Smith, M. Thornton, CRV. Tomson; *St George's Hospital, London* (4) – A. Belli, C. Lawson, G. MacGregor\*; P. Swift; *St James' University Hospital, Leeds* (7) – D. Burwell, D. Kessel, A. Mooney\*, CG. Newstead, A. Nicholson, J. Patel; *St Luke's Hospital, Bradford* (12) – H. Akbani, J. Barber, R. Jeffrey\*, R. Lowe; *Walsgrave Hospital, Coventry* (2) – N. Aldridge, S. Hewins, R. Higgins, J. Rush, D. Zehnder\*; *Wishaw General Hospital* (1) – M. Fleet\*; *Withington Hospital, Wythenshawe* (12) – P. Ackrill, R. Ashleigh\*, D. Martin, M. Venning; *Worcestershire Royal Hospital* (8) – P. Slaney, S. Spencer\*; *York Hospital* (3) – A. Bowker, C. Jones, D. Richardson, N. Warnock, D. Worth\*; *Ysbyty Maelor, Wrexham* (4) – W. Ahmed, S. Argarwal, P. Drew, D. Glover, SW. Robertson\*, J. Welham, V. Wyn-Jones.
